# Supplementary material for: Novel Perspectives on the Design and Development of a Long-Acting Subcutaneous Raltegravir Injection for Treatment of HIV—In Vitro and In Vivo Evaluation
Source: MDPI journal article supplement (doi:10.3390/pharmaceutics15051530), 2023-05-18
Supplement: s1 [file s1]

# Novel Perspectives on the Design and Development of a Long-Acting Subcutaneous Raltegravir Injection for Treatment of HIV—In Vitro and In Vivo Evaluation

Heba S. Abd-Ellah <sup>1,2</sup>, Ramesh Mudududdla <sup>1,\*</sup>, Glen P. Carter <sup>3</sup> and Jonathan B. Baell <sup>1,4,\*</sup>

<sup>1</sup> Medicinal Chemistry, Monash Institute of Pharmaceutical Sciences, Parkville, VIC 3052, Australia; hebasaleh.chem@gmail.com

<sup>2</sup> Medicinal Chemistry Department, Faculty of Pharmacy, Minia University, Minia 61519, Egypt

<sup>3</sup> Microbiology and Immunology Department, Peter Doherty Institute for Infection and Immunity, The University of Melbourne, Parkville, VIC 3001, Australia; glen.carter@unimelb.edu.au

<sup>4</sup> School of Pharmaceutical Sciences, Nanjing Tech University, No. 30 South Puzhu Road, Nanjing 211816, China

\* Correspondence: ramesh.mudududdla@monash.edu (R.M.); jonathan.baell@njtech.edu.cn or jbaell29@gmail.com (J.B.B.); Tel.: +61470330093 (R.M.); +61402194571 (J.B.B.)

## Table of content

|                                                                                                                                                       | Figures | Pages |
|-------------------------------------------------------------------------------------------------------------------------------------------------------|---------|-------|
| NMR spectra of key intermediates <b>9a-b</b> , <b>10a-b</b> , <b>11a</b> , <b>13a-b</b> , <b>19a-b</b> , and final probes <b>14-15</b> , <b>20-21</b> | S1-S30  | 1-16  |
| NMR spectra of intermediates <b>23</b> , <b>24</b> , side products <b>22</b> , <b>26</b> and prodrug <b>25</b>                                        | S31-44  | 17-23 |

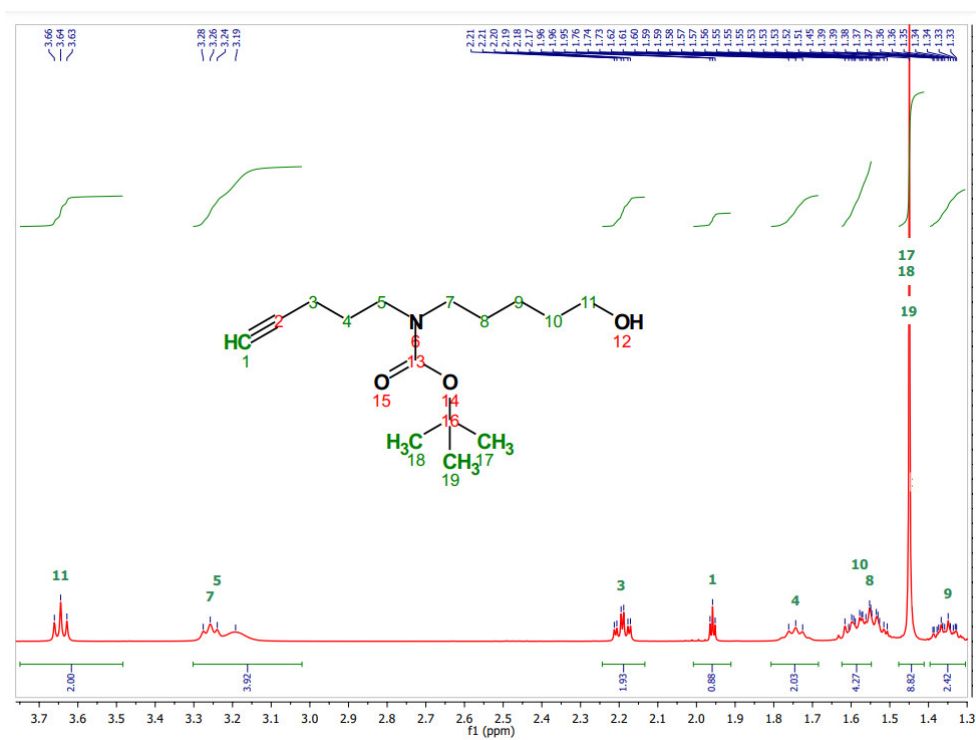

Figure S1. <sup>1</sup>H NMR of **9a** in CDCl<sub>3</sub>.

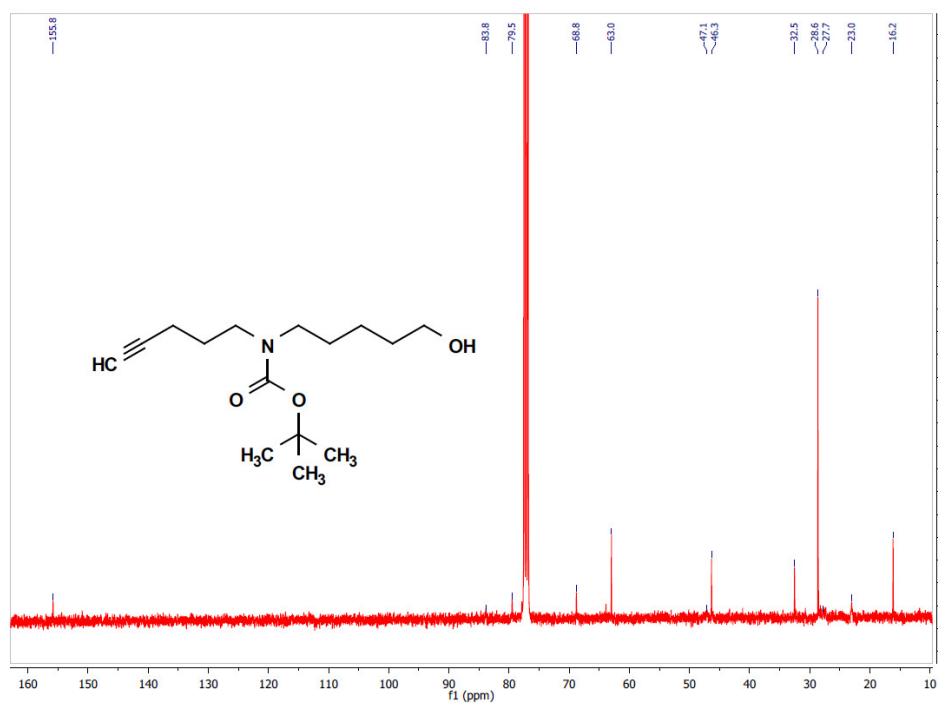

Figure S2. <sup>13</sup>C NMR of **9a** in CDCl<sub>3</sub>.

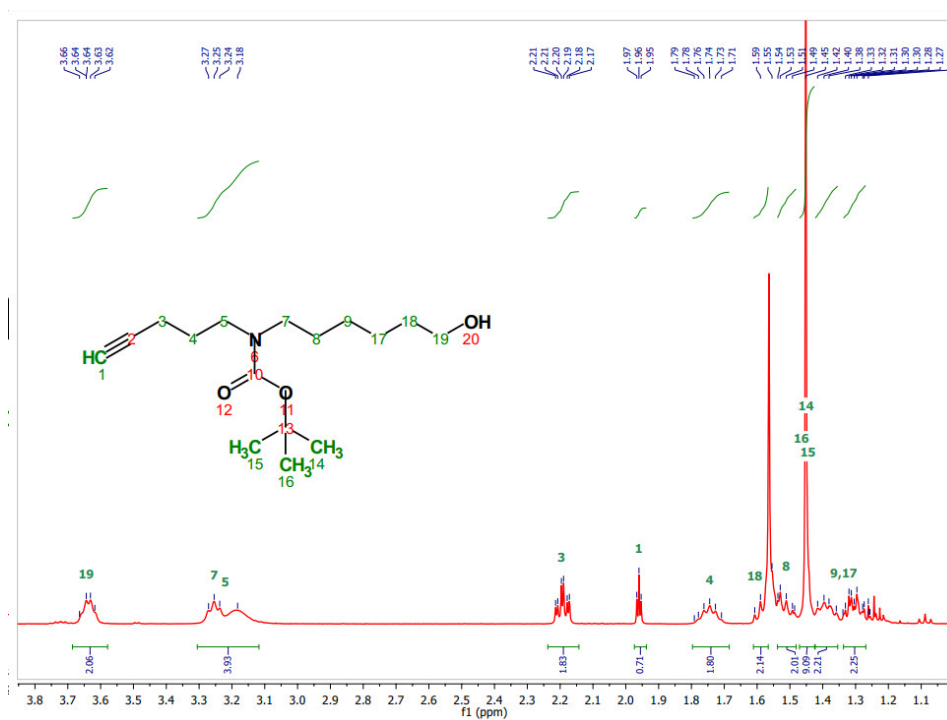

Figure S3. <sup>1</sup>H NMR of **9b** in CDCl<sub>3</sub>.

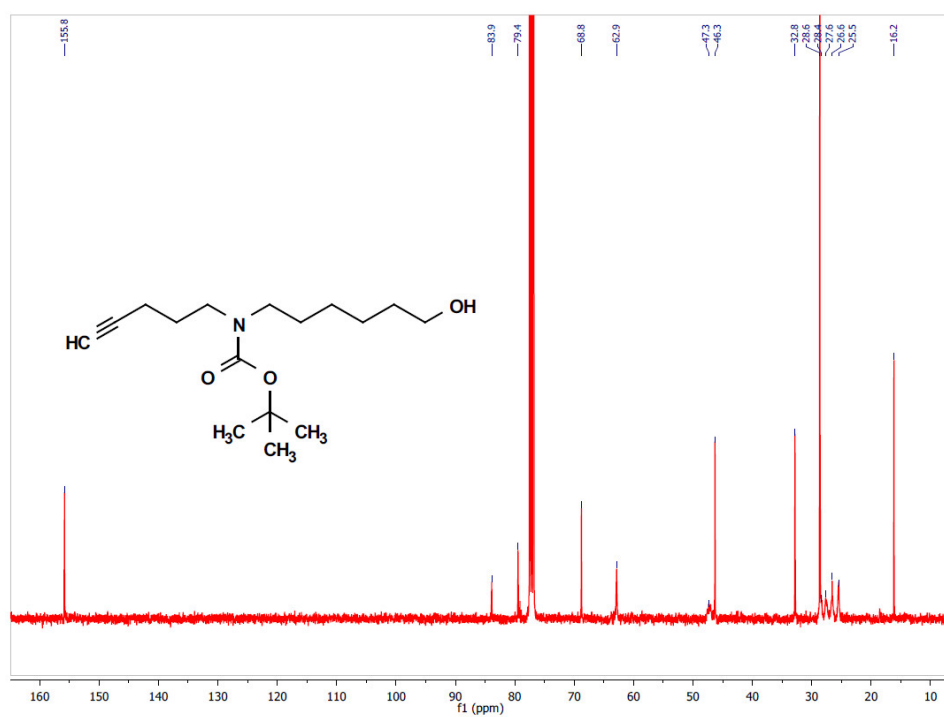

Figure S4. <sup>13</sup>C NMR of **9b** in CDCl<sub>3</sub>.

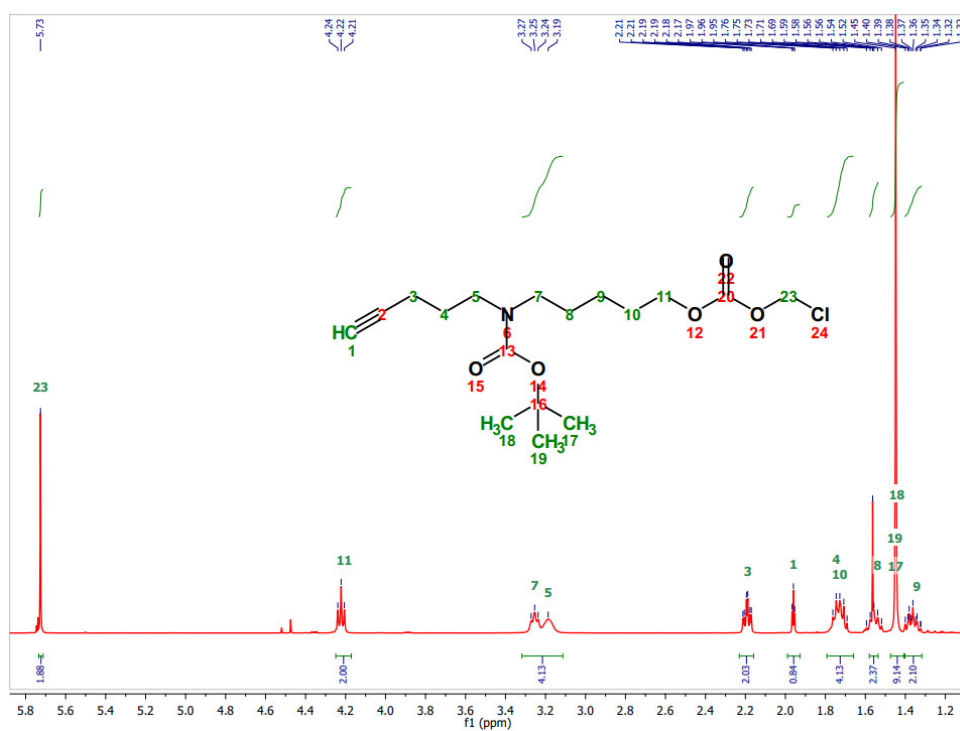

Figure S5. <sup>1</sup>H NMR of **10a** in CDCl<sub>3</sub>.

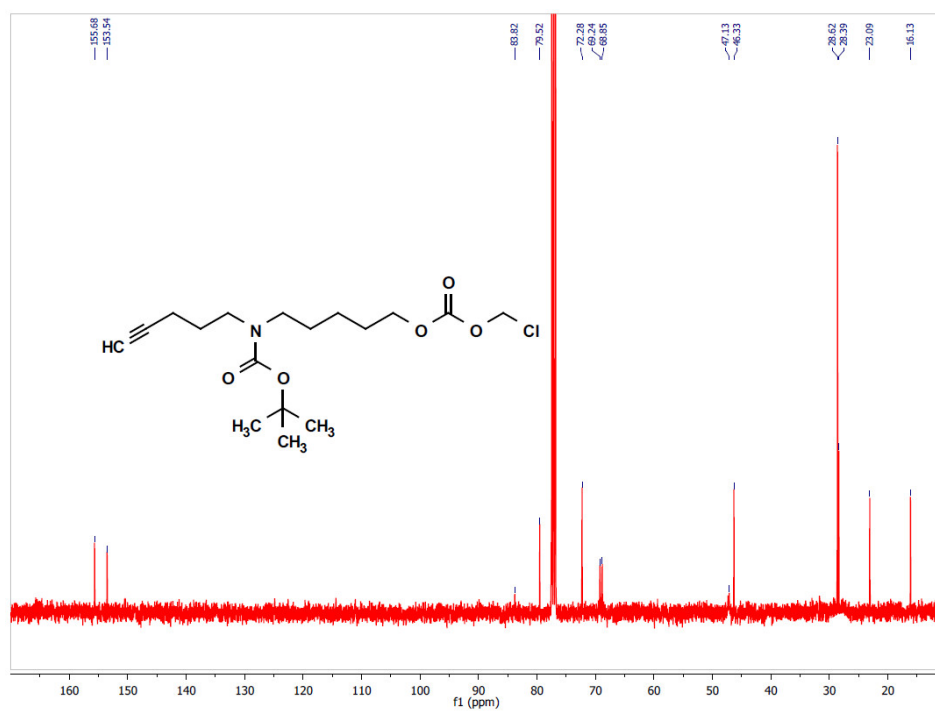

Figure S6. <sup>13</sup>C NMR of **10a** in CDCl<sub>3</sub>.

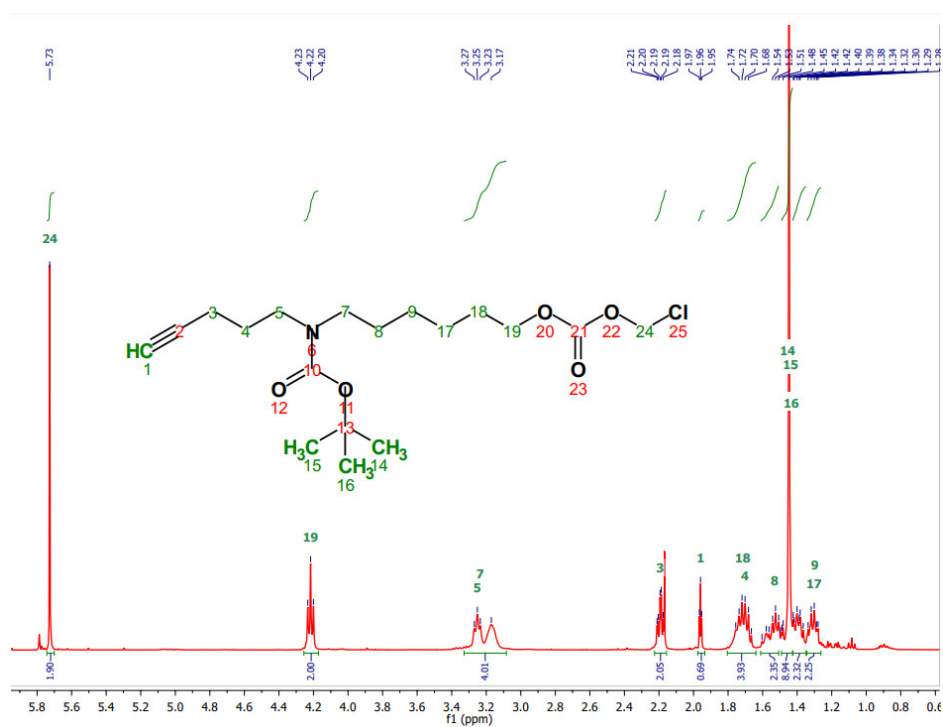

Figure S7. <sup>1</sup>H NMR of **10b** in CDCl<sub>3</sub>.

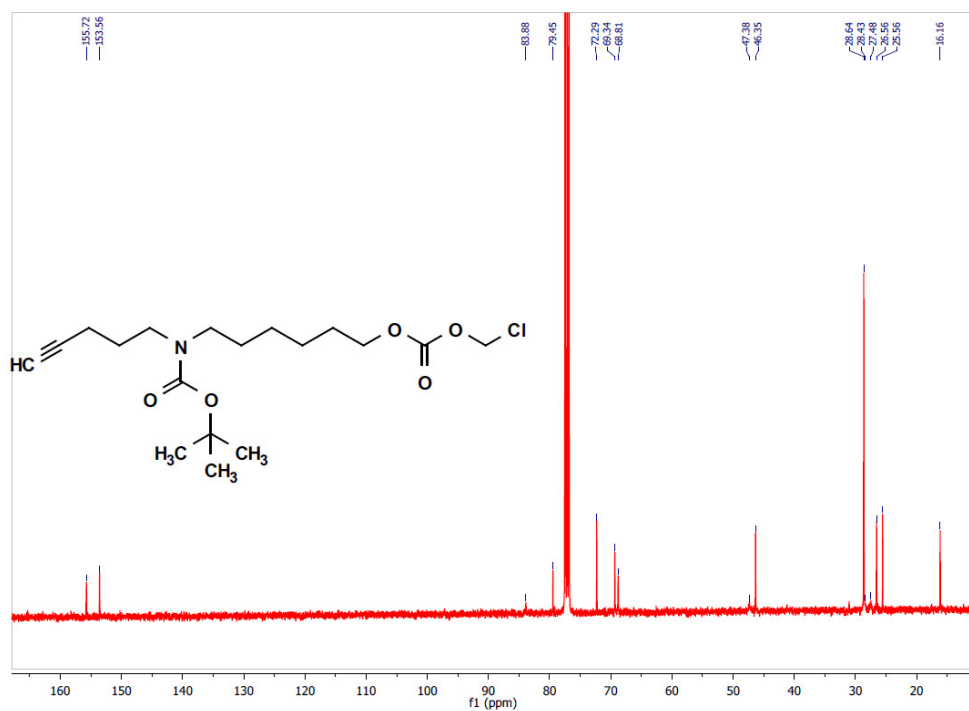

Figure S8. <sup>13</sup>C NMR of **10b** in CDCl<sub>3</sub>.

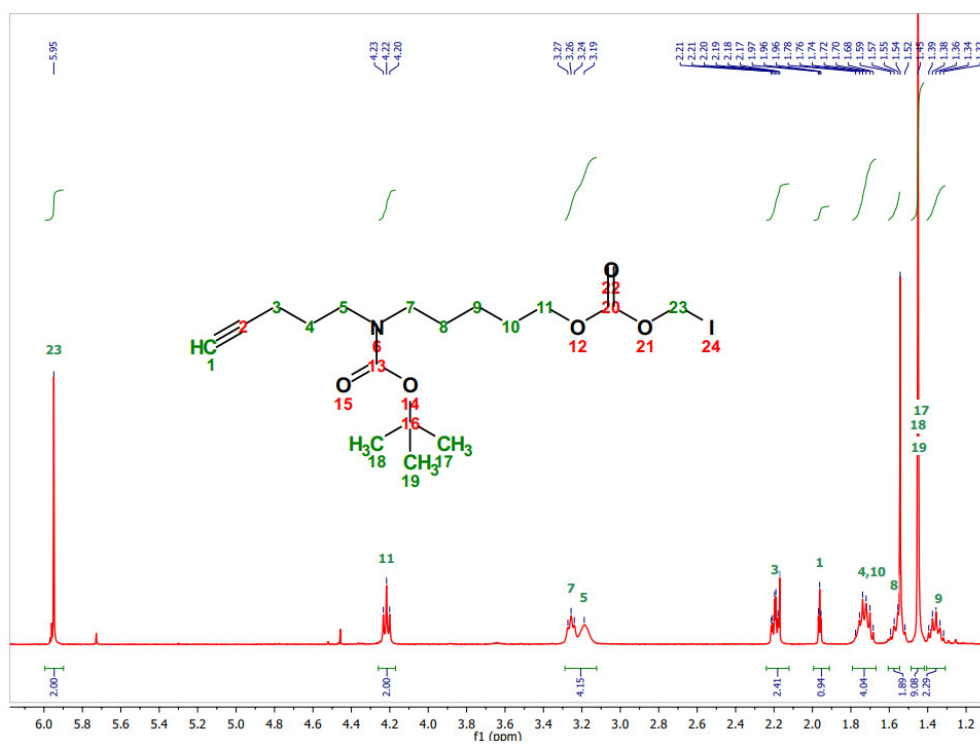

Figure S9. <sup>1</sup>H NMR of **11a** in CDCl<sub>3</sub>.

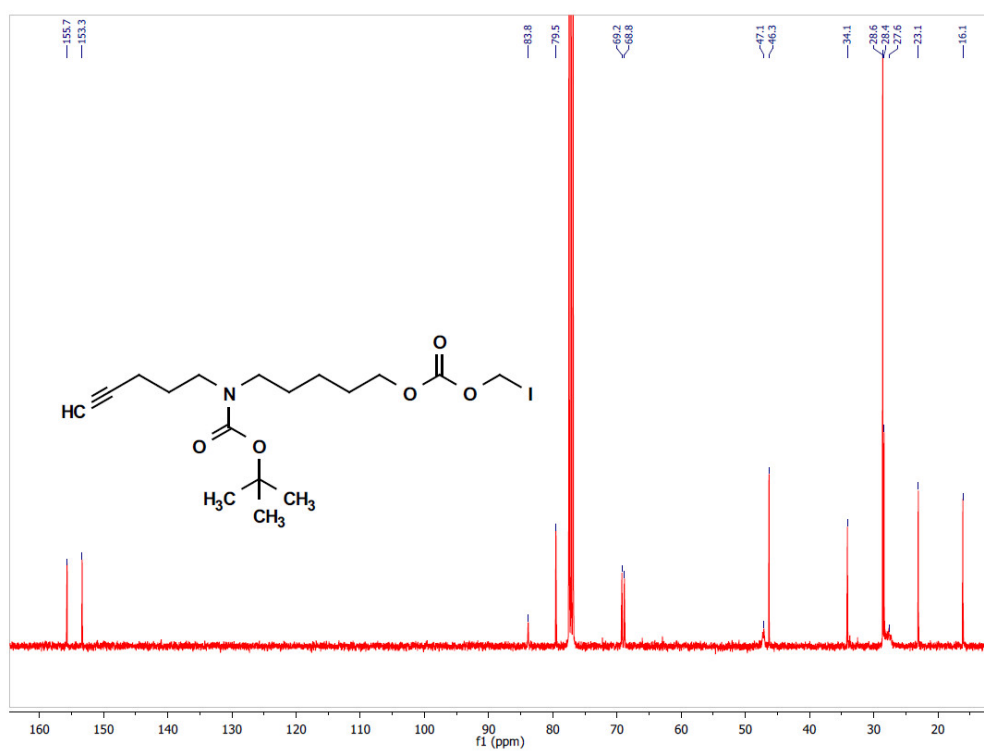

Figure S10. <sup>13</sup>C NMR of **11a** in CDCl<sub>3</sub>.

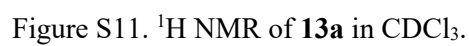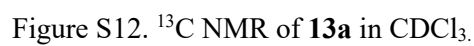

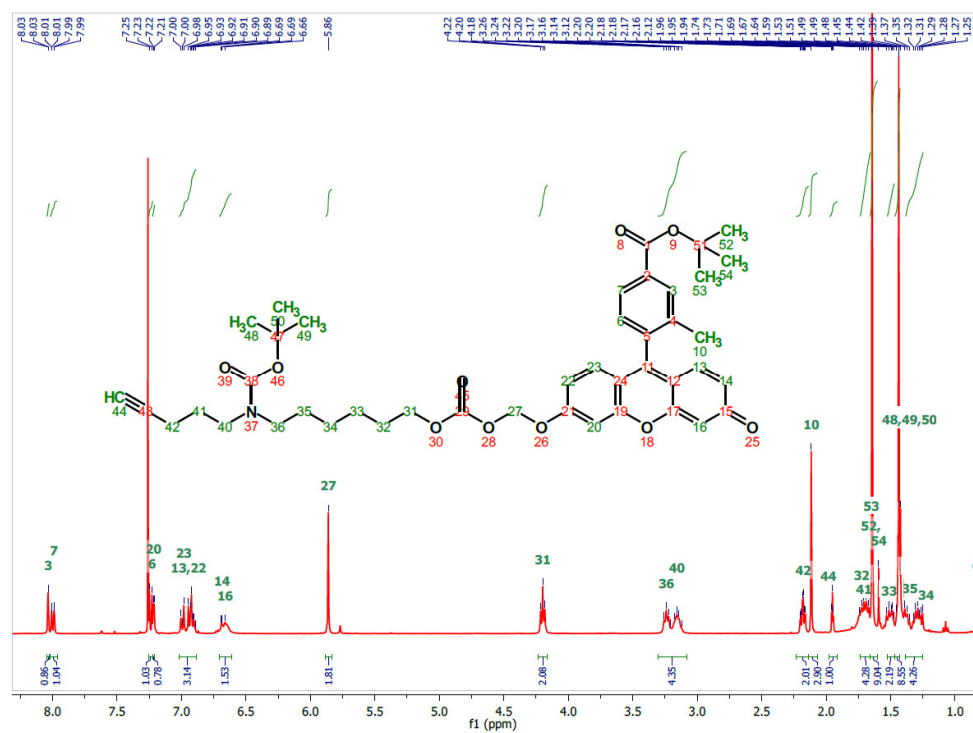

Figure S13. <sup>1</sup>H NMR of **13b** in CDCl<sub>3</sub>.

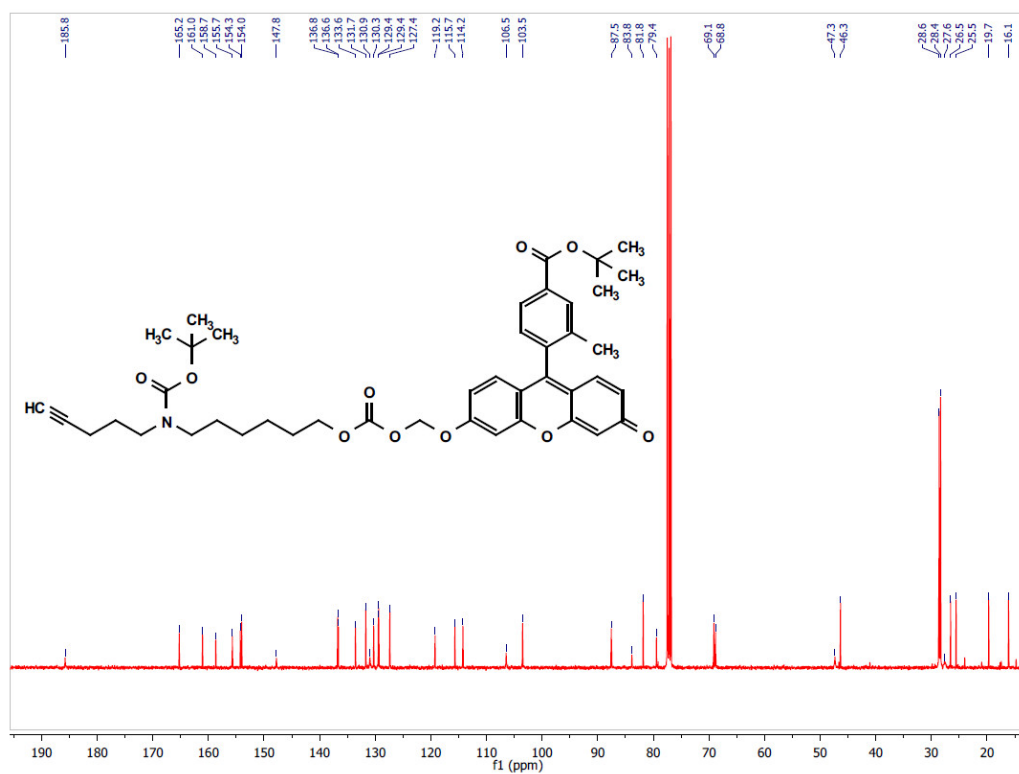

Figure S14. <sup>13</sup>C NMR of **13b** in CDCl<sub>3</sub>.



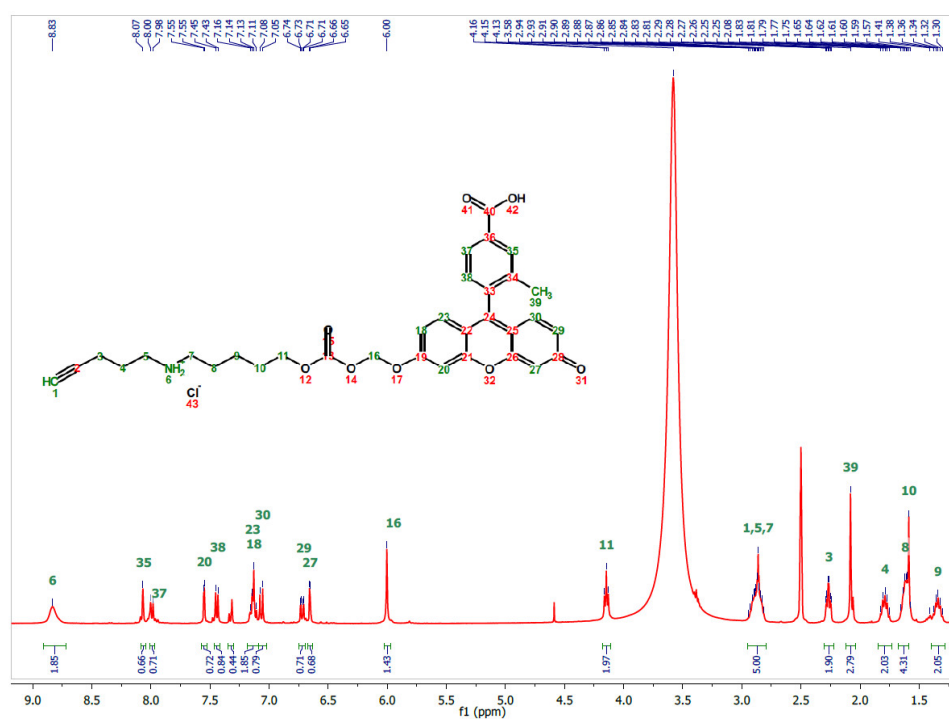

Figure S15. <sup>1</sup>H NMR of probe **14** in DMSO-d<sub>6</sub>.

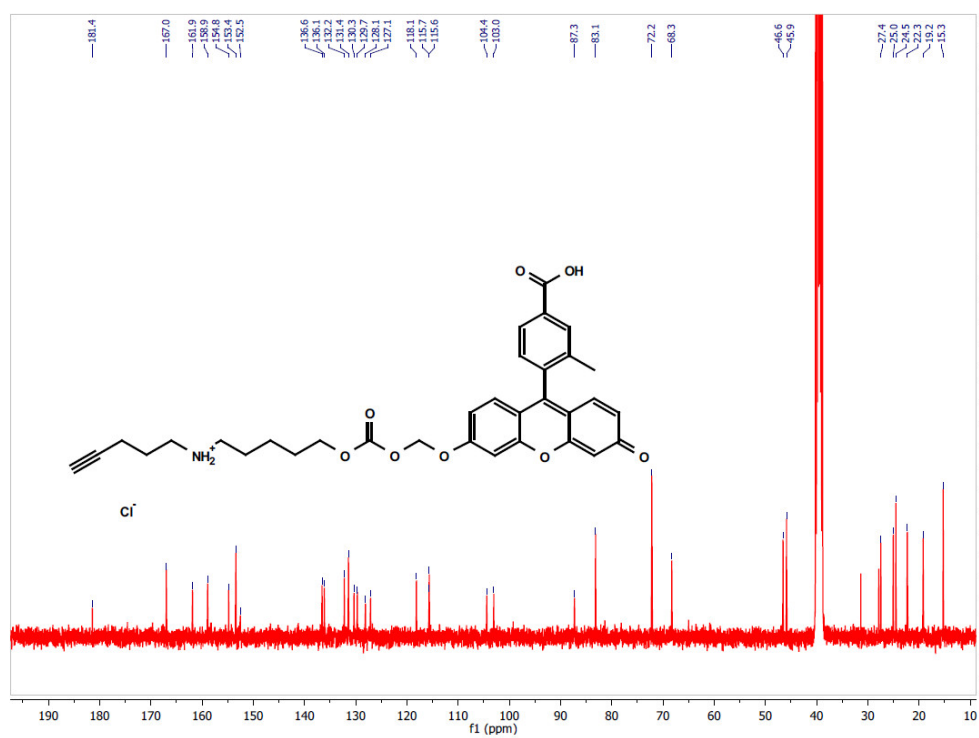

Figure S16. <sup>13</sup>C NMR of probe **14** in CDCl<sub>3</sub>.



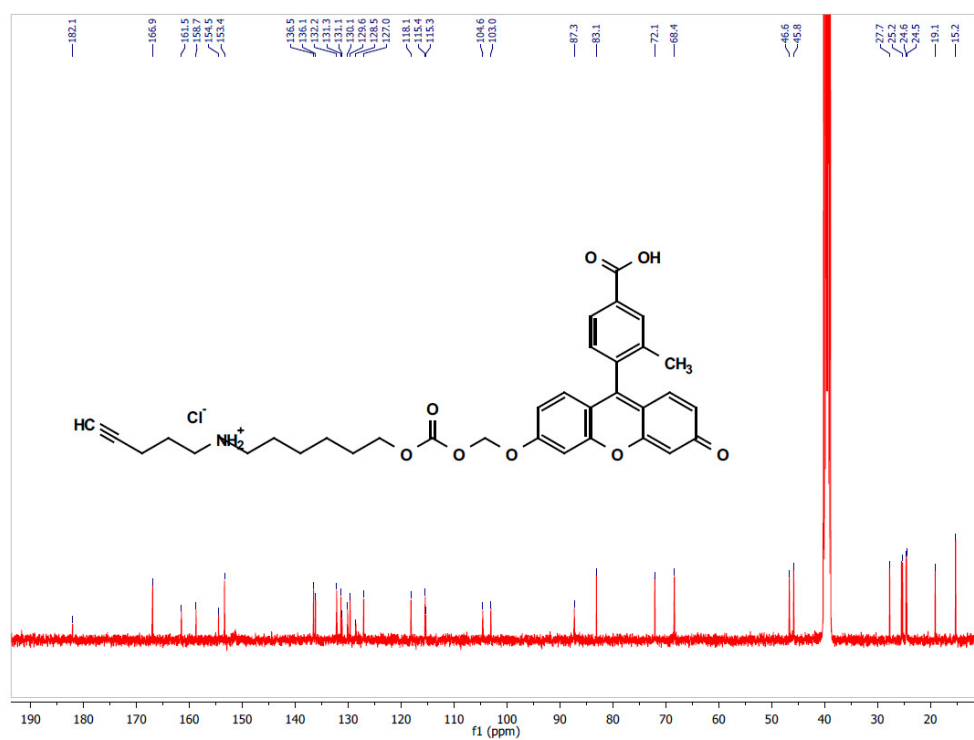

Figure S19.  $^{13}\text{C}$  NMR of probe **15** in  $\text{CDCl}_3$ .

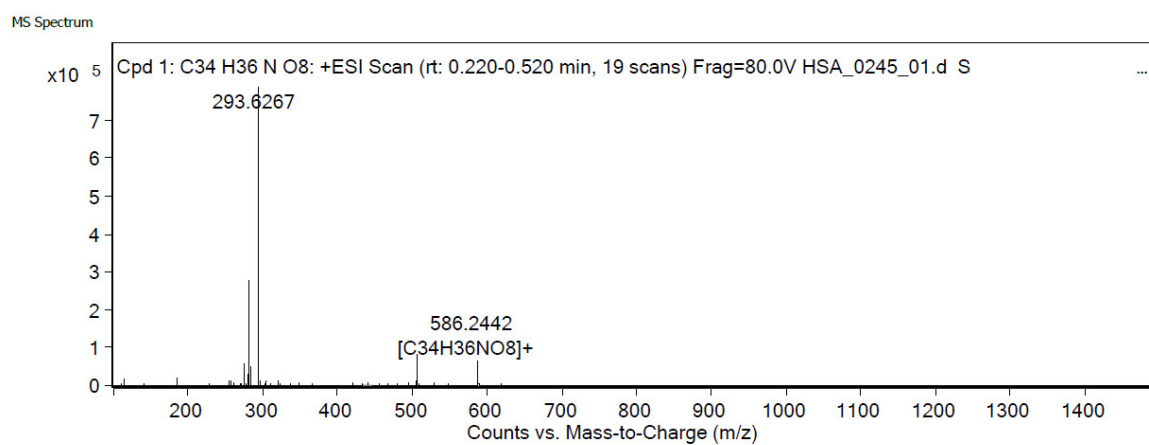

Figure S20. HRMS of probe **15**.

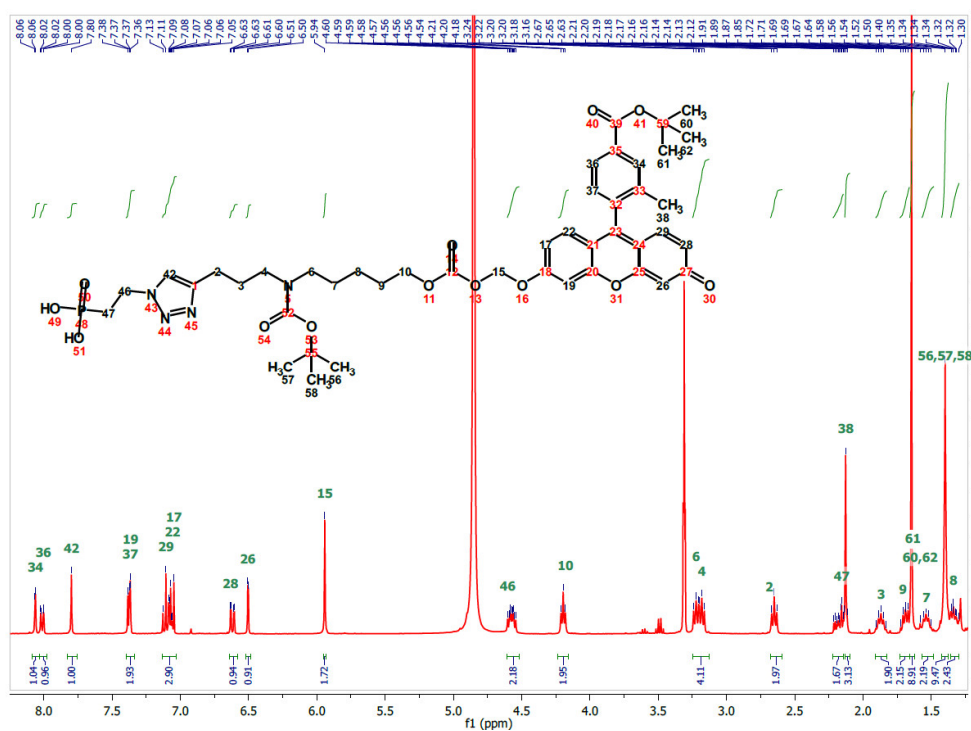

Figure S21. <sup>1</sup>H NMR of **19a** in MeOD.

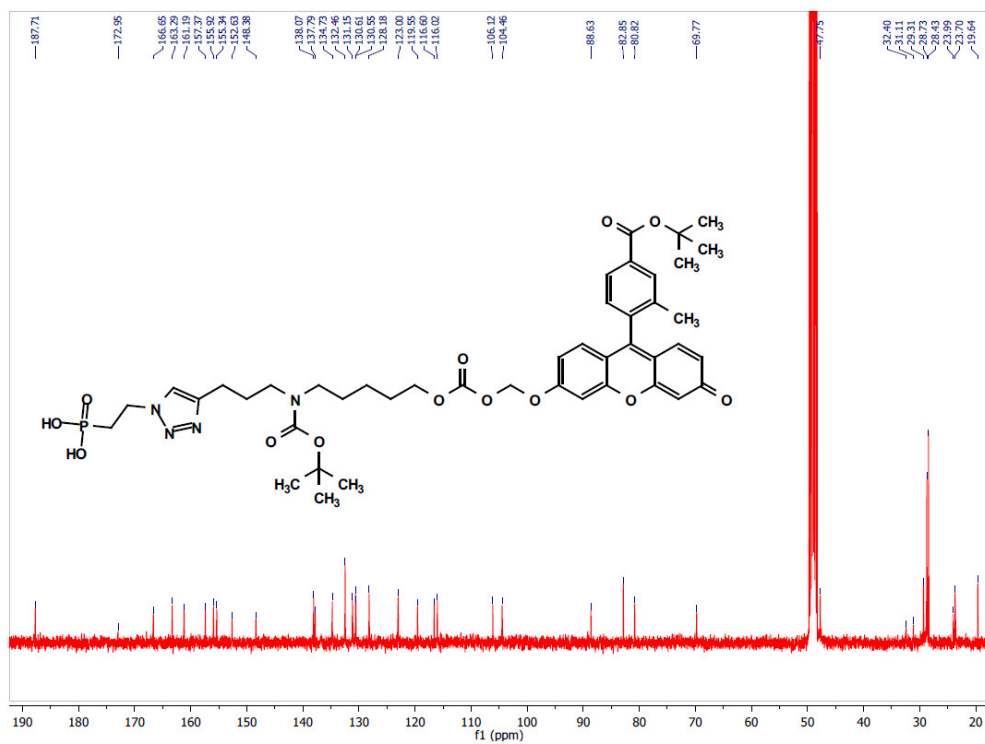

Figure S22. <sup>13</sup>C NMR of **19a** in MeOD.

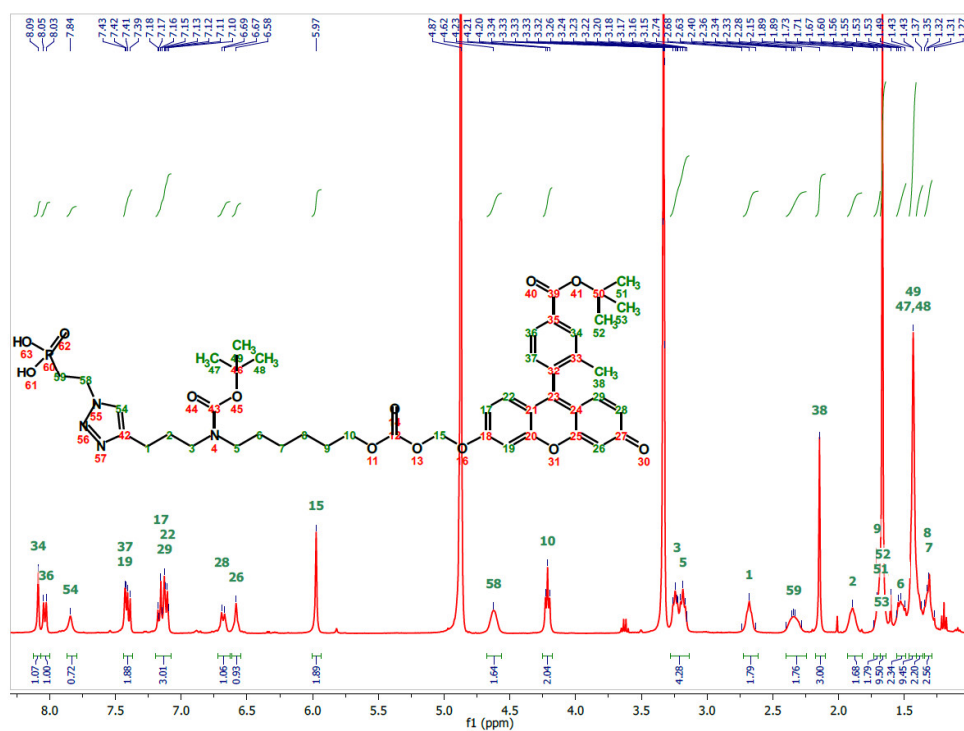

Figure S23. <sup>1</sup>H NMR of **19b** in MeOD.

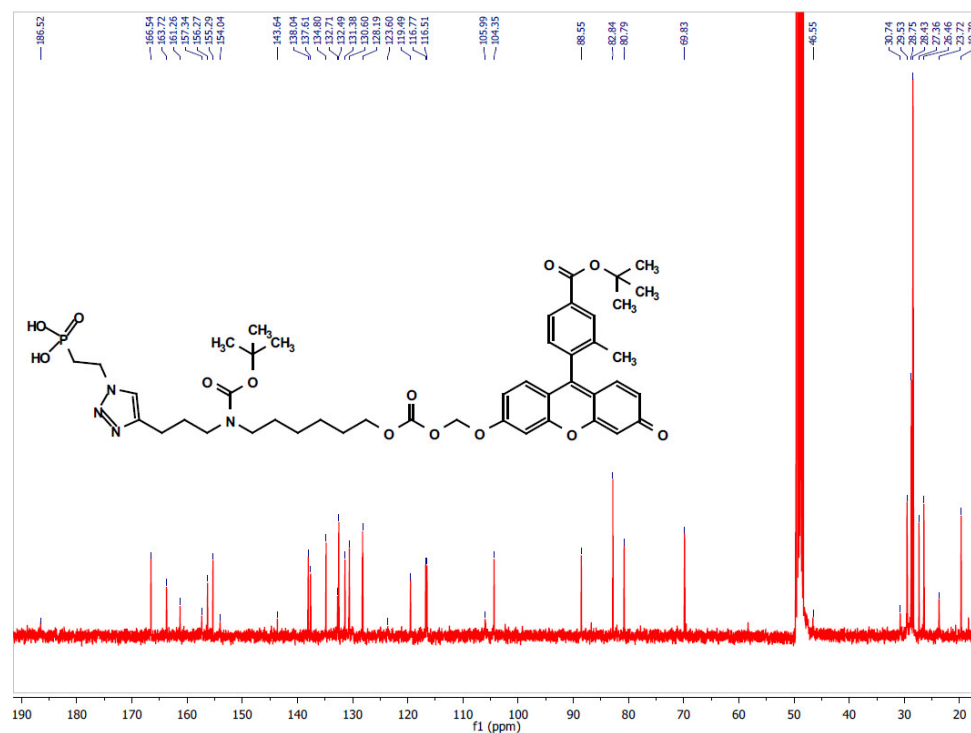

Figure S24. <sup>13</sup>C NMR of **19b** in MeOD.

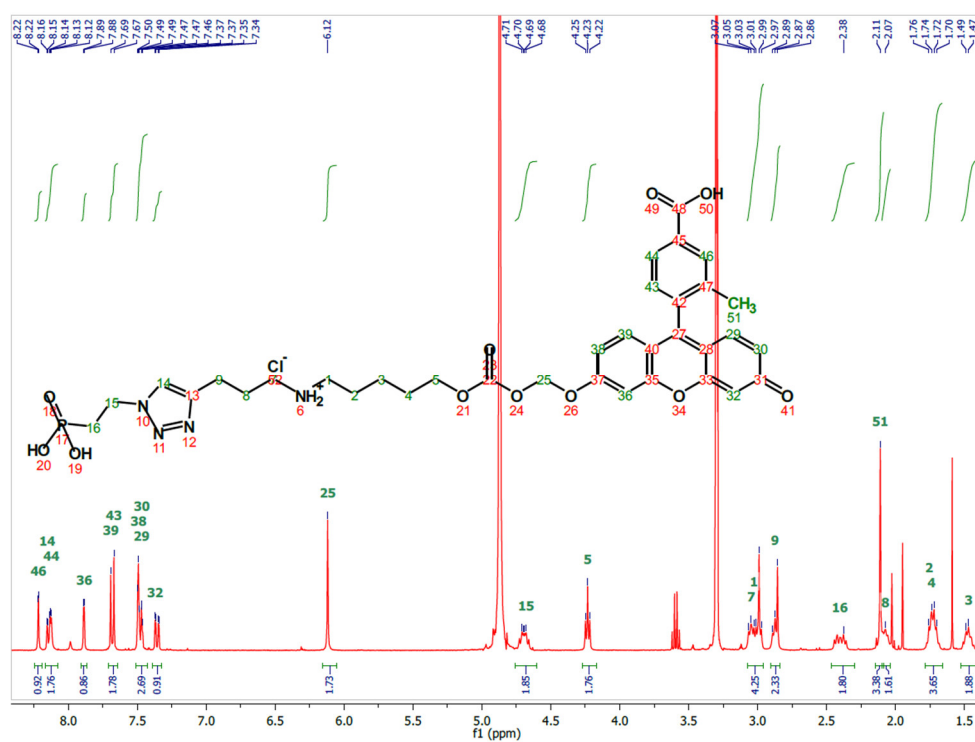

Figure S25. <sup>1</sup>H NMR of probe **20** in MeOD.

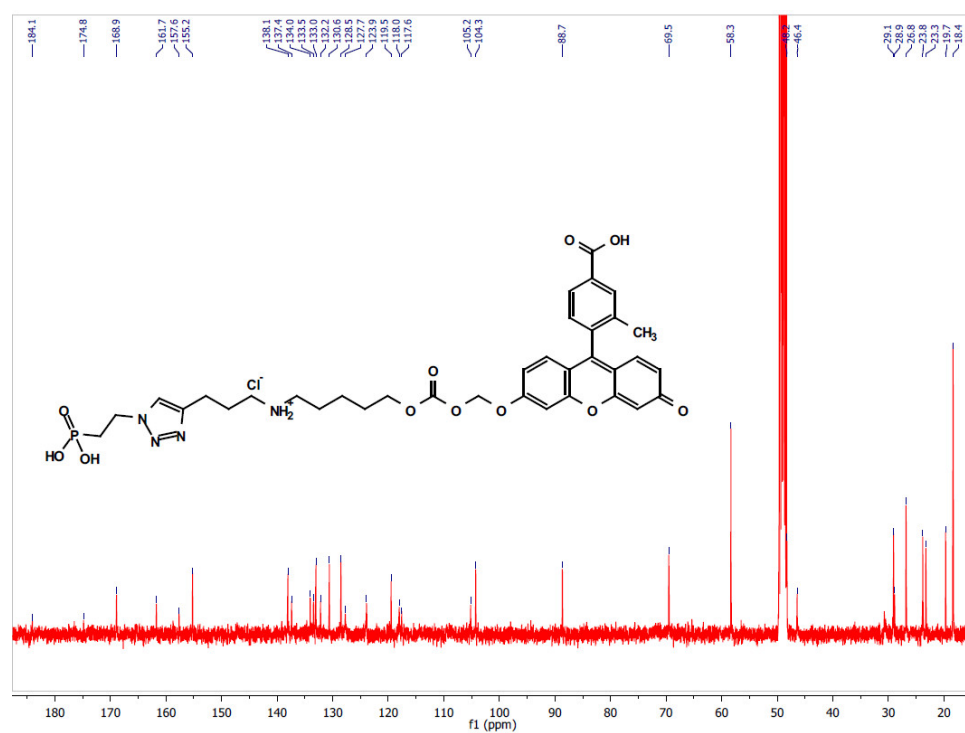

Figure S26. <sup>13</sup>C NMR of probe **20** in MeOD.

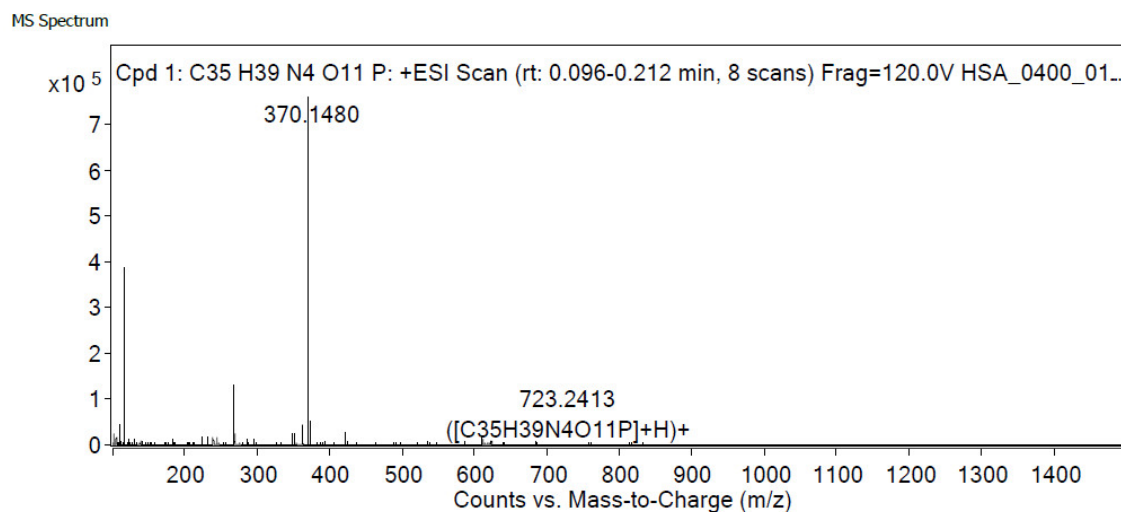

Figure S27. HRMS of probe **20**.

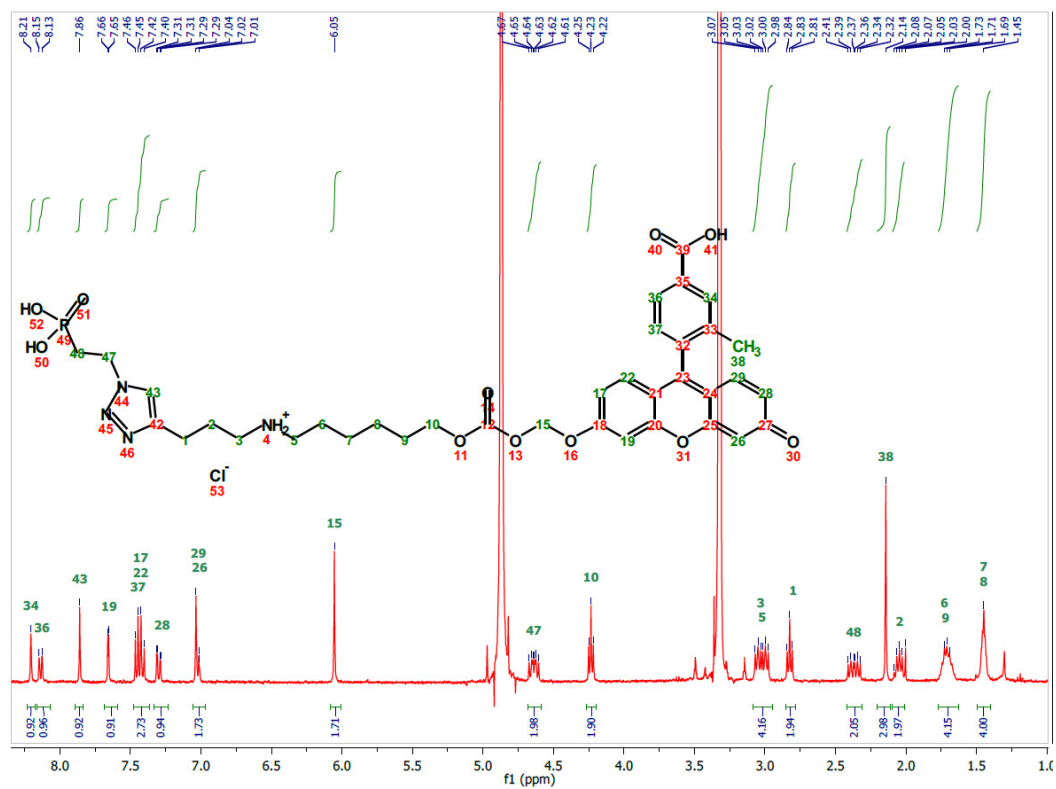

Figure S28. <sup>1</sup>H NMR of probe **21** in MeOD.

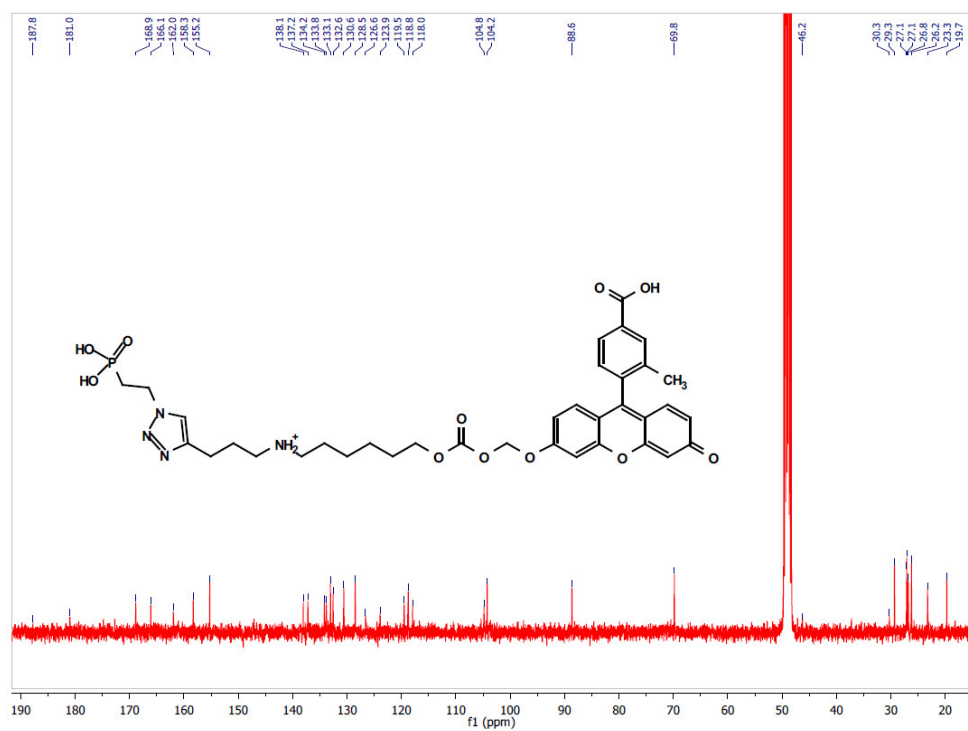

Figure S29. <sup>13</sup>C NMR of probe **21** in MeOD.

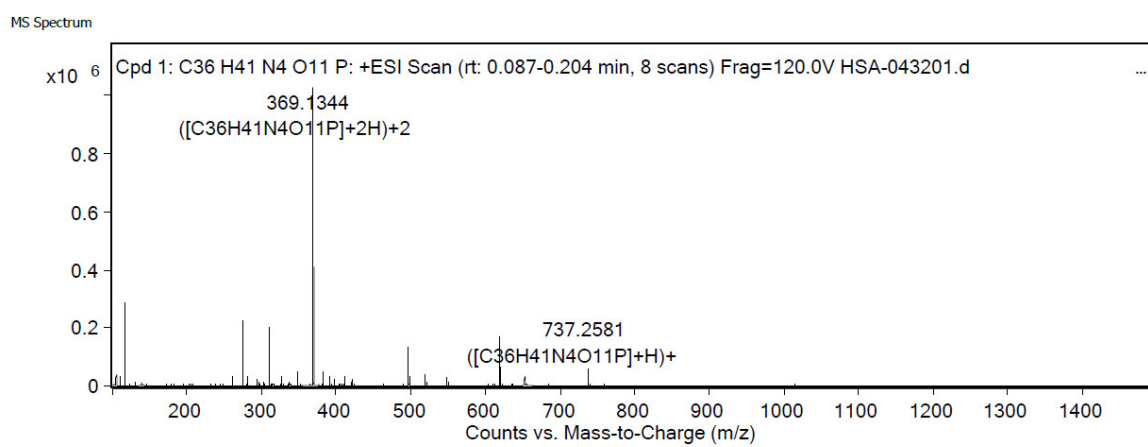

Figure S30. HRMS of probe **21**.



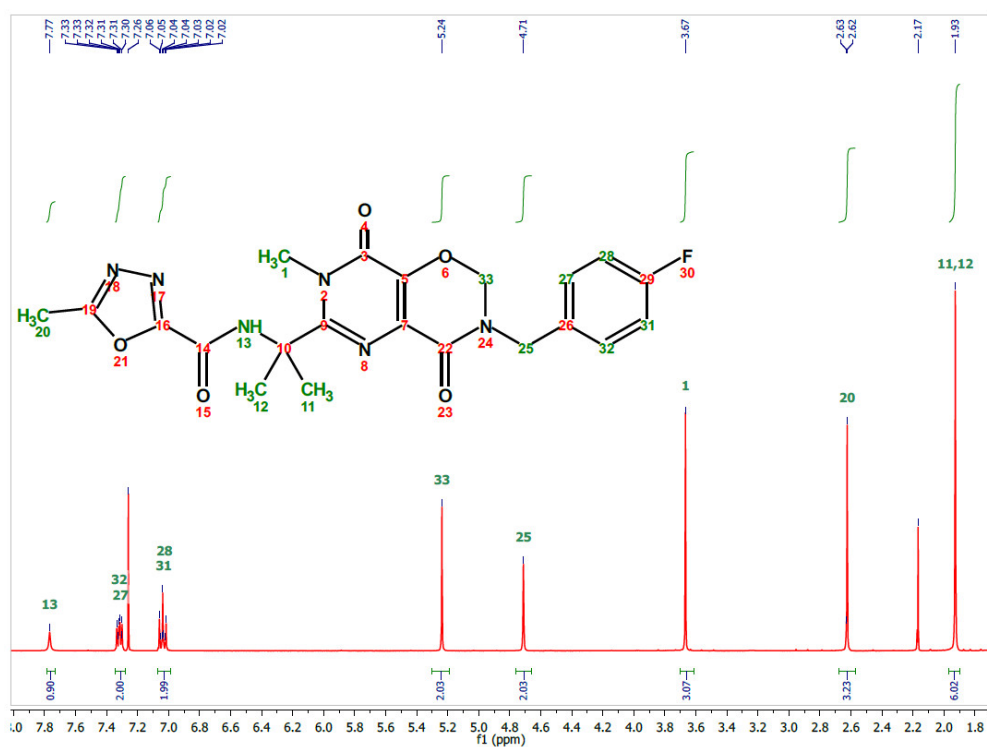

Figure S31. <sup>1</sup>H NMR of **22** in CDCl<sub>3</sub>.

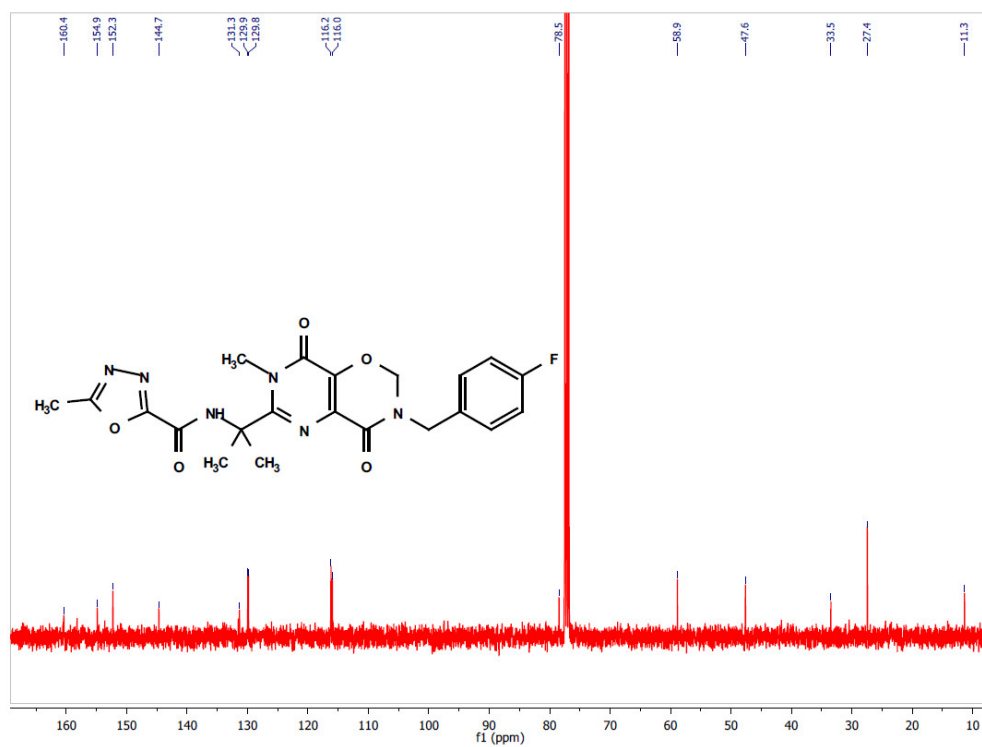

Figure S32. <sup>13</sup>C NMR of **22** in CDCl<sub>3</sub>.

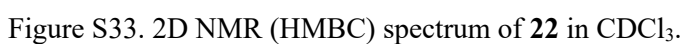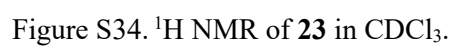

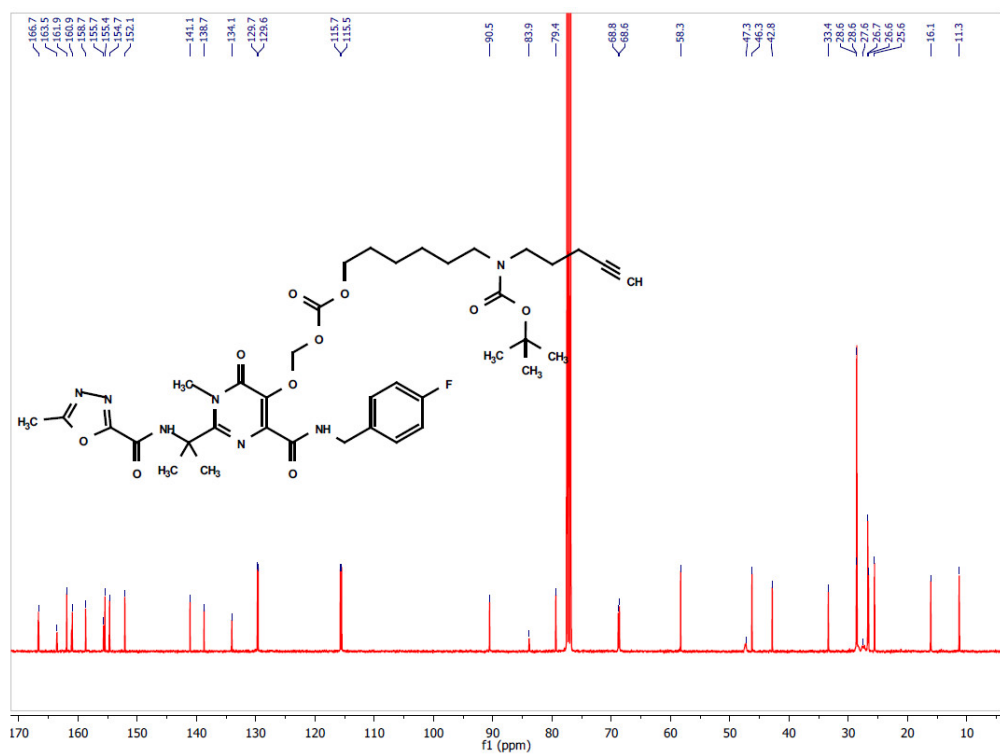

Figure S35.  $^{13}\text{C}$  NMR of **23** in  $\text{CDCl}_3$ .

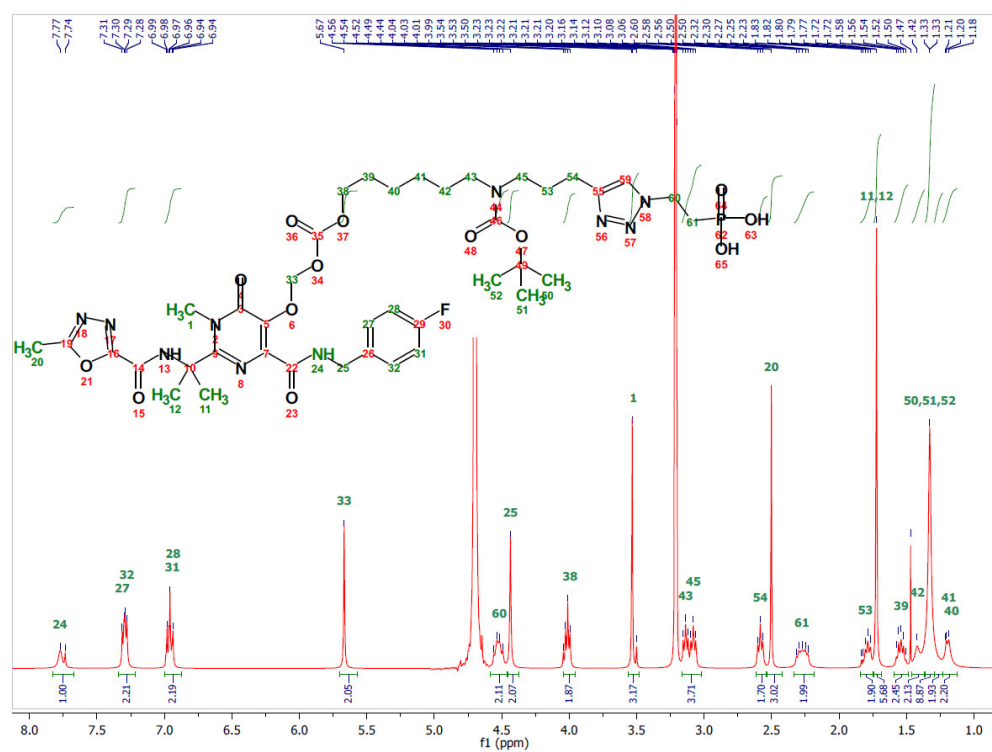

Figure S36.  $^1\text{H}$  NMR of **24** in  $\text{MeOD}$ .

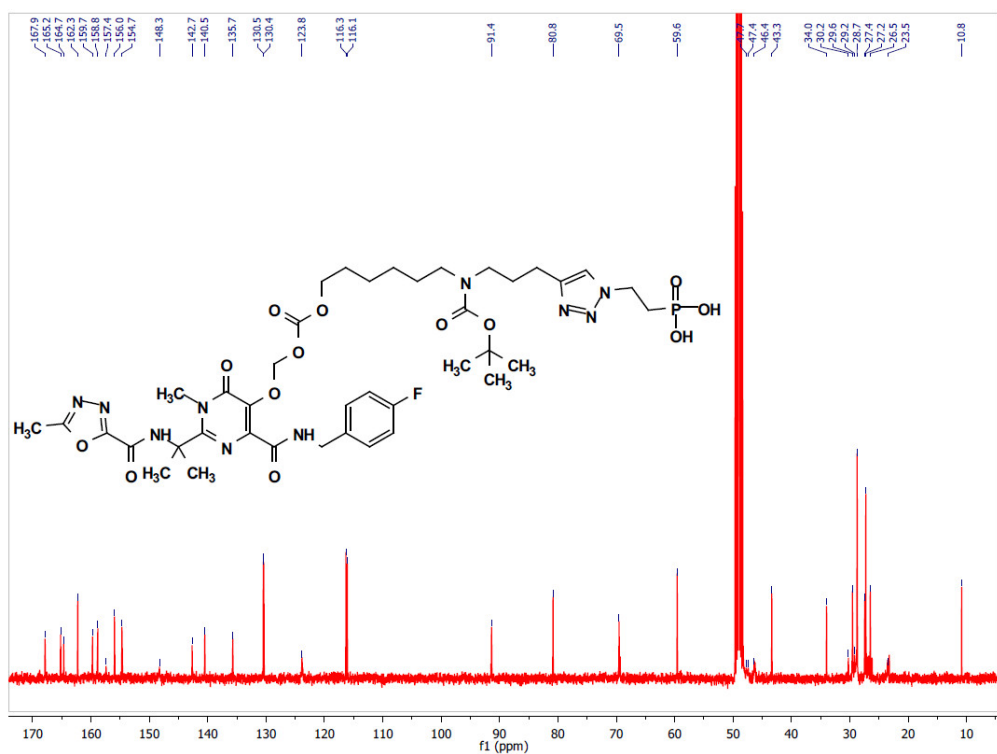

Figure S37.  $^{13}\text{C}$  NMR of **24** in MeOD.

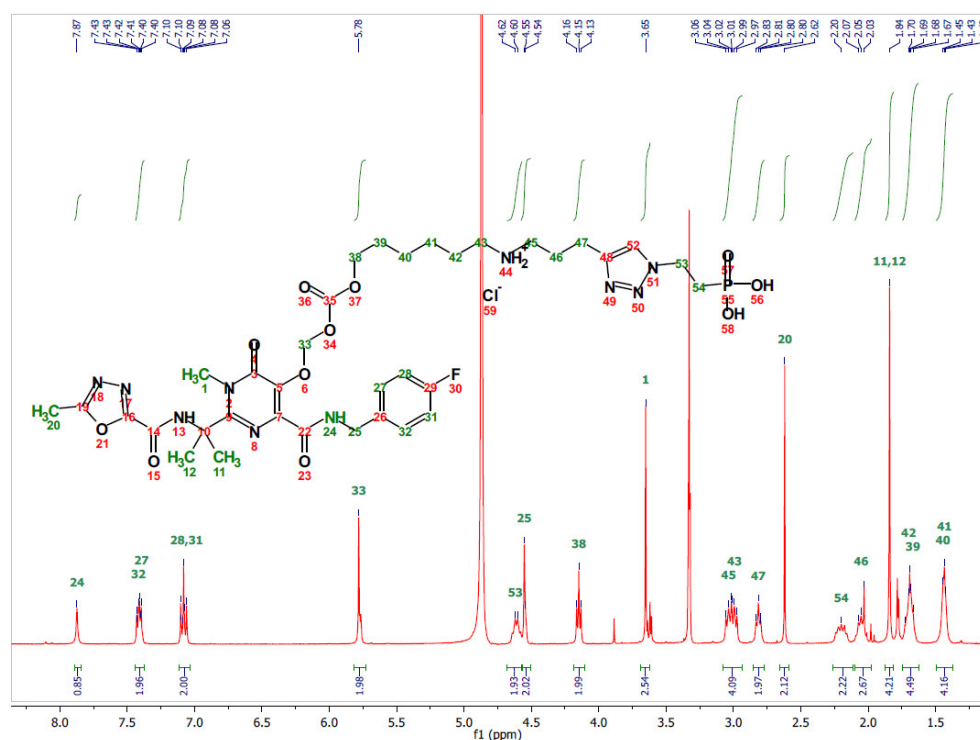

Figure S38.  $^1\text{H}$  NMR of prodrug **25** in MeOD.

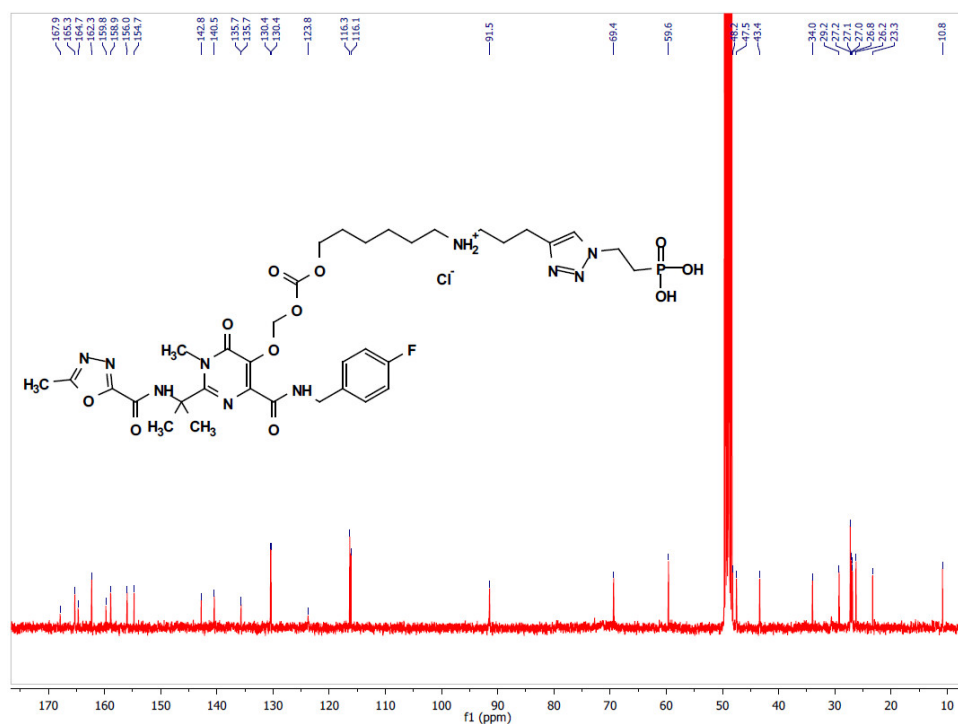

Figure S39.  $^{13}\text{C}$  NMR of prodrug **25** in MeOD.

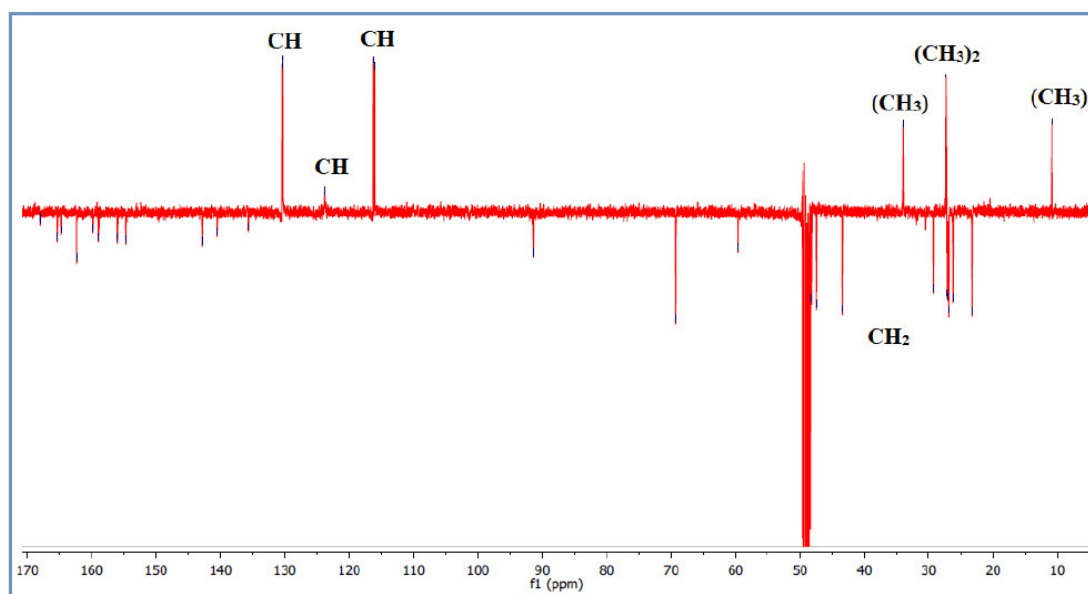

Figure S40. DEPT 135  $^{13}\text{C}$  NMR of prodrug **25** in MeOD.

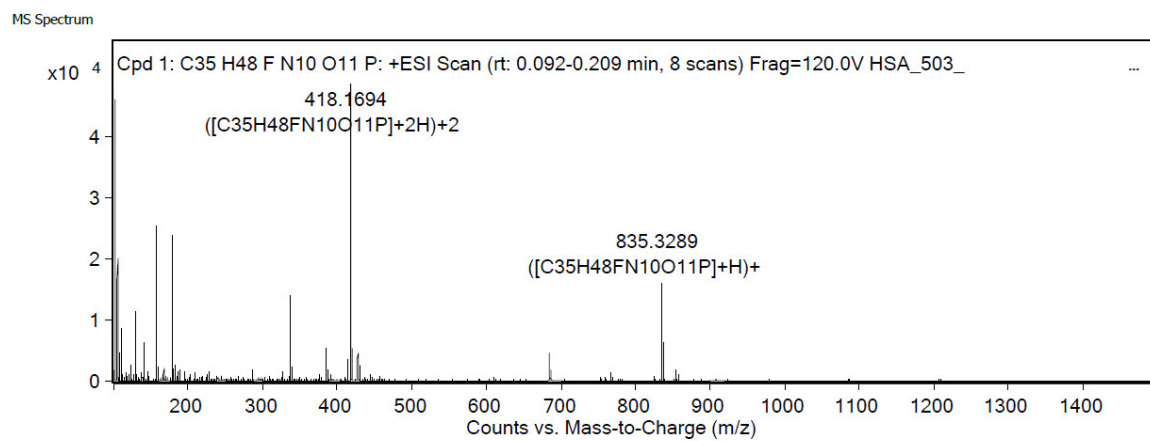

Figure S41. HRMS of prodrug **25**.

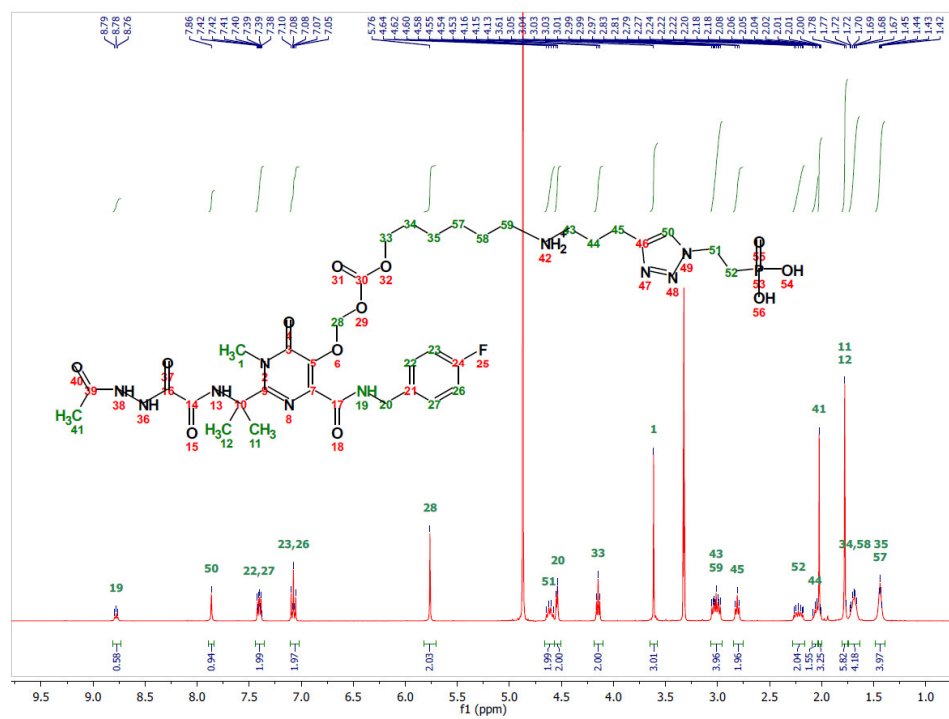

Figure S 42. <sup>1</sup>H NMR of **26** in MeOD.

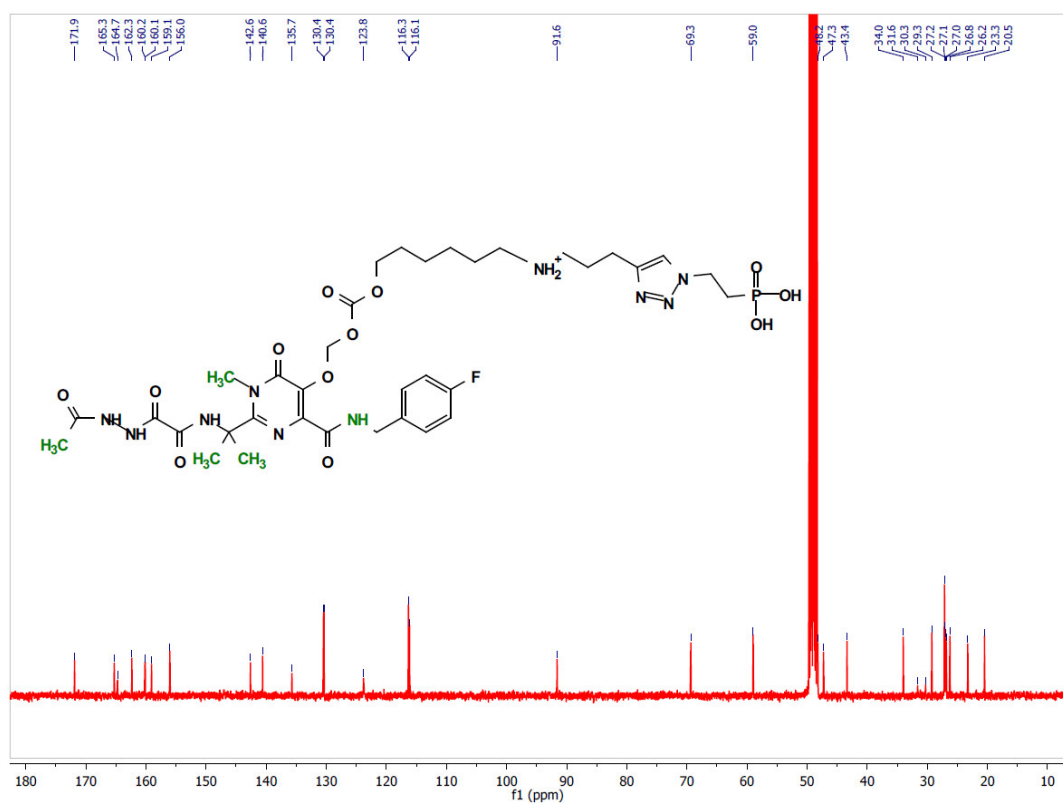

Figure S43. <sup>13</sup>C NMR of **26** in MeOD.

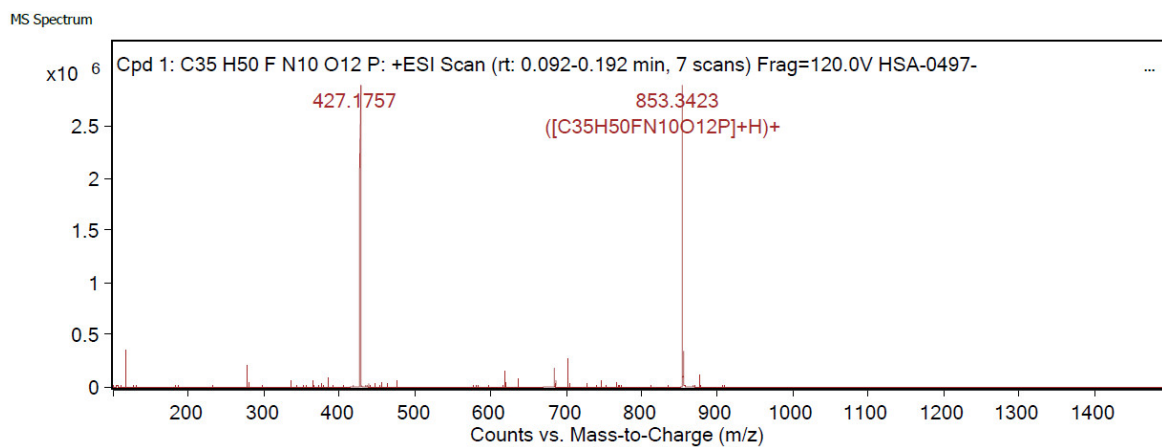

Figure S44. HRMS of **26**.
